# Supplementary material for: Stereoselective direct reductive amination of ketones with electron-deficient amines using Re2O7/NaPF6 catalyst
Source: Royal Society of Chemistry journal article supplement (doi:10.1039/c3ob40918j), 2013-01-01
Supplement: c3ob40918j.pdf [file c3ob40918j.pdf]

**Supporting Information - I: Experimental Procedures and Characterization**

**Stereoselective Direct Reductive Amination of Ketones with Electron-Deficient Amines using  $\text{Re}_2\text{O}_7/\text{NaPF}_6$  Catalyst**

**Braja Gopal Das and Prasanta Ghorai\***

Department of Chemistry, Indian Institute of Science Education and Research Bhopal,  
Bhopal-462023, India. *E-mail:* [pghorai@iiserb.ac.in](mailto:pghorai@iiserb.ac.in)

| <b>Contents:</b>                                                                     | <b>Page:</b> |
|--------------------------------------------------------------------------------------|--------------|
| General Experimental Procedures                                                      | 2            |
| Optimization of reaction conditions                                                  | 2            |
| Standard procedure for reductive amination of ketone                                 | 3            |
| Benzyl cyclohexylcarbamate ( <b>3a</b> )                                             | 3            |
| Benzyl cyclopentylcarbamate ( <b>3b</b> )                                            | 3            |
| Benzyl cycloheptylcarbamate ( <b>3c</b> )                                            | 3            |
| Benzyl cyclooctylcarbamate ( <b>3d</b> )                                             | 4            |
| Benzyl (1-benzoylpiperidin-4-yl)carbamate ( <b>3e</b> )                              | 4            |
| Benzyl (tetrahydro-2H-thiopyran-4-yl)carbamate ( <b>3f</b> )                         | 4            |
| Benzyl-adamantan-2-ylcarbamate ( <b>3g</b> )                                         | 4            |
| tert-Butyl 1,4-dioxaspiro[4.5]decan-8-ylcarbamate ( <b>3h</b> )                      | 5            |
| Benzyl sec-butylcarbamate ( <b>3i</b> )                                              | 5            |
| Benzyl (3-methylbutan-2-yl)carbamate ( <b>3j</b> )                                   | 5            |
| Benzyl(4-phenylbutan-2-yl)carbamate ( <b>3k</b> )                                    | 5            |
| Benzyl pentan-3-ylcarbamate ( <b>3l</b> )                                            | 6            |
| Benzyl undecan-6-ylcarbamate ( <b>3m</b> )                                           | 6            |
| Ethyl cyclohexylcarbamate ( <b>3n</b> )                                              | 6            |
| tert-butyl cyclohexylcarbamate ( <b>3o</b> )                                         | 6            |
| (9H-Fluoren-9-yl)methyl cyclohexylcarbamate ( <b>3p</b> )                            | 7            |
| N-Cyclohexylbenzenesulfonamide ( <b>3q</b> )                                         | 7            |
| N-Cyclohexyl-4-methylbenzenesulfonamide ( <b>3r</b> )                                | 7            |
| N-Cyclohexyl-4-nitrobenzenesulfonamide ( <b>3s</b> )                                 | 7            |
| N-Cyclohexylmethanesulfonamide ( <b>3t</b> )                                         | 8            |
| N-Cyclohexylbenzamide ( <b>3u</b> )                                                  | 8            |
| N-Cyclohexylacetamide ( <b>3v</b> )                                                  | 8            |
| 3-cyclohexyloxazolidin-2-one ( <b>3w</b> )                                           | 8            |
| 4-Methyl-N-(2-methylcyclohexyl)benzenesulfonamide ( <b>6a</b> )                      | 9            |
| (9H-fluoren-9-yl)methyl (2-methylcyclohexyl)carbamate ( <b>6b</b> )                  | 9            |
| tert-Butyl (2-methylcyclohexyl)carbamate ( <b>6c</b> )                               | 9            |
| tert-Butyl (2-allylcyclohexyl)carbamate ( <b>6d</b> )                                | 9            |
| N-(2-Allylcyclohexyl)-4-methylbenzenesulfonamide ( <b>6e</b> )                       | 10           |
| Benzyl (2-allylcyclohexyl)carbamate ( <b>6f</b> )                                    | 10           |
| 4-Methyl-N-(2-(3-methylbut-2-en-1-yl)cyclohexyl)benzenesulfonamide ( <b>6g</b> )     | 10           |
| (E)-Benzyl (2-cinnamylcyclohexyl)carbamate ( <b>6h</b> )                             | 10           |
| Synthesis of (1-(1-Tosyloctahydro-1H-indol-2-yl)butan-2-one ( <b>8</b> )             | 11           |
| Synthesis of Benzyl 2-(hydroxymethyl)octahydro-1H-indole-1-carboxylate ( <b>10</b> ) | 11           |
| References                                                                           | 12           |

### General Experimental Procedures:

All reagents and solvents were used as supplied commercially. Commercial  $\text{Re}_2\text{O}_7$ , ranging in color from yellow to brown-black, were stored in a desiccators over  $\text{CaCl}_2$ . Reactions were conducted in open atmosphere. Analytical thin-layer chromatography (TLC) were performed on 0.2 mm coated Science silica gel (EM 60-F254) plates purchased from Merck, Germany. Visualization was accomplished with UV light (254 nm) and exposure to either ethanolic phosphomolybdic acid (PMA), anisaldehyde or  $\text{KMnO}_4$ ,  $\text{CeSO}_4$  + ammonium phosphomolybdate + 10%  $\text{H}_2\text{SO}_4$ , ninhydrine solution followed by heating. Melting points are uncorrected.  $^1\text{H}$  NMR spectra were acquired on a Bruker AVANCE (at 400 MHz or 500 MHz) and chemical shifts are reported relative to the residual solvent peak.  $^{13}\text{C}$  NMR spectra were acquired on either a Bruker AVANCE (at 100 MHz or 125 MHz) and chemical shifts are reported in ppm relative to the residual solvent peak. Unless noted, NMR spectra were acquired in  $\text{CDCl}_3$ ; individual peaks are reported as: multiplicity, integration, coupling constant in Hz. All IR spectra were obtained as neat films with a Perkin-Elmer Model 2000 FT-IR and selected absorbances are reported in  $\text{cm}^{-1}$ . Low resolution (LR) and High-resolution (HR) mass spectrometry data were acquired by the Central Instrumentation Facility, Indian Institute of Science Education and Research Bhopal on a Bruker Daltonics MicroTOF-Q-II Mass Spectrometer using  $\text{CH}_3\text{CN}/\text{H}_2\text{O}$  as solvent.

### Optimization of the reaction conditions:

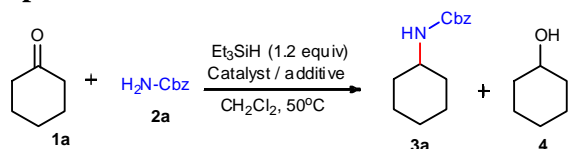

|    | Catalysts (1.5 mol %)                              | Additives (mol %)                      | Solvent                  | t/min      | <b>3</b> [%] <sup>a</sup> |
|----|----------------------------------------------------|----------------------------------------|--------------------------|------------|---------------------------|
| 1  | $\text{Re}_2\text{O}_7$                            |                                        | $\text{CH}_2\text{Cl}_2$ | rt, 3 d    | 0                         |
| 2  | $\text{Re}_2\text{O}_7$                            |                                        | $\text{CH}_2\text{Cl}_2$ | reflux, 9h | 0                         |
| 3  | $\text{ReCl}_3\text{O}(\text{PPh}_3)_2$            |                                        | $\text{CH}_2\text{Cl}_2$ | 20h        | 0                         |
| 4  | $\text{ReIO}_2(\text{PPh}_3)_2$                    |                                        | $\text{CH}_2\text{Cl}_2$ | 20h        | 0                         |
| 5  | $\text{ReCl}_3\text{O}(\text{SMe}_2)\text{OPPh}_3$ |                                        | $\text{CH}_2\text{Cl}_2$ | 20h        | 0                         |
| 6  | $\text{Re}_2\text{O}_7$                            | $\text{NaBF}_4$ (20)                   | $\text{CH}_2\text{Cl}_2$ | 15h        | 100                       |
| 7  | $\text{Re}_2\text{O}_7$                            | $\text{NH}_4\text{PF}_6$ (20)          | $\text{CH}_2\text{Cl}_2$ | 15h        | 46                        |
| 8  | $\text{Re}_2\text{O}_7$                            | $\text{KPF}_6$ (20)                    | $\text{CH}_2\text{Cl}_2$ | 15h        | 7                         |
| 9  | $\text{Re}_2\text{O}_7$                            | $\text{NaSbF}_6$ (20)                  | $\text{CH}_2\text{Cl}_2$ | 15h        | 5                         |
| 10 | $\text{ReCl}_3\text{O}(\text{SMe}_2)\text{PPh}_3$  | $\text{NaPF}_6$ (20)                   | $\text{CH}_2\text{Cl}_2$ | 20h        | 7                         |
| 11 | $\text{ReIO}_2(\text{PPh}_3)_2$                    | $\text{NaPF}_6$ (20)                   | $\text{CH}_2\text{Cl}_2$ | 20h        | 11                        |
| 12 | <b><math>\text{Re}_2\text{O}_7</math></b>          | <b><math>\text{NaPF}_6</math> (20)</b> | $\text{CH}_2\text{Cl}_2$ | <b>15h</b> | <b>100</b>                |
| 13 | $\text{Re}_2\text{O}_7$                            | $\text{NaPF}_6$ (20)                   | THF                      | 15h        | 2.5                       |
| 14 | $\text{Re}_2\text{O}_7$                            | $\text{NaPF}_6$ (20)                   | $\text{Et}_2\text{O}$    | 15h        | 55                        |
| 15 | $\text{Re}_2\text{O}_7$                            | $\text{NaPF}_6$ (20)                   | Toluene                  | 15h        | 36                        |
| 16 | $\text{Re}_2\text{O}_7$                            | $\text{NaPF}_6$ (20)                   | MeOH                     | 15h        | 0                         |
| 17 | $\text{Re}_2\text{O}_7$                            | $\text{NaPF}_6$ (20)                   | $\text{CH}_3\text{CN}$   | 15h        | 4                         |
| 18 | <b><math>\text{Re}_2\text{O}_7</math></b>          | <b><math>\text{NaPF}_6</math> (20)</b> | $\text{CH}_2\text{Cl}_2$ | <b>20h</b> | <b>(79)<sup>b</sup></b>   |
| 19 | $\text{Re}_2\text{O}_7$                            | $\text{NaPF}_6$ (5)                    | $\text{CH}_2\text{Cl}_2$ | 20h        | (48) <sup>b</sup>         |

|    |                                   |                        |                                 |     |                   |
|----|-----------------------------------|------------------------|---------------------------------|-----|-------------------|
| 20 | Re <sub>2</sub> O <sub>7</sub>    | NaPF <sub>6</sub> (10) | CH <sub>2</sub> Cl <sub>2</sub> | 20h | (60) <sup>b</sup> |
| 21 |                                   | NaPF <sub>6</sub> (20) | CH <sub>2</sub> Cl <sub>2</sub> | 20h | 0                 |
| 22 | NH <sub>4</sub> OReO <sub>3</sub> | NaPF <sub>6</sub> (20) | CH <sub>2</sub> Cl <sub>2</sub> | 20h | 0                 |

<sup>[a]</sup>The % was determined by <sup>1</sup>H NMR spectroscopy of the reaction mixture using *p*-anisaldehyde. <sup>[b]</sup>In parentheses the yield of the isolated product after column chromatography.

**Standard procedure for reductive amination of ketone:** To a stirred solution of carbonyl (1.00 mmol) and amine (1.20 mmol, 1.2 equiv) in CH<sub>2</sub>Cl<sub>2</sub> (3.0 ml) was taken in a round bottom flask fitted with reflux condenser, sodium hexafluorophosphate (20 mol %) and triethylsilane (1.20 mmol, 1.2 equiv) was added followed by the addition of Re<sub>2</sub>O<sub>7</sub> (1.5 mol %). After stirring at 50°C on an oil-bath for a given time on *Table 2, 3, or 4*, the reaction mixture was passed through a small silica bed & washed properly with dichloromethane. The solvent was removed under vacuum and the crude was purified by flash column chromatography (EtOAc/n-Hexane) on silica gel.

**Benzyl cyclohexylcarbamate (3a):**<sup>1</sup> 79% yield; R<sub>f</sub> = 0.25 (5:95 = EtOAc/n-

Hexane); Colorless solid; mp. 81-84°C; IR (neat): 3320, 2931, 2855, 1699, 1684, 1540, 1456, 1313, 1276, 1143, 1050, 965, 825, 724, 693, 614 cm<sup>-1</sup>; <sup>1</sup>H

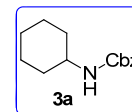

NMR (400 MHz, CDCl<sub>3</sub>): 7.39-7.29 (m, 5H), 5.11 (s, 2H), 4.69 (s, 2H), 3.53 (m, 1H), 1.98-1.94 (m, 2H), 1.75-1.70 (m, 2H), 1.64-1.60 (m, 1H), 1.37 (m, 2H), 1.23-1.14 (m, 3H); <sup>13</sup>C NMR (100 MHz, CDCl<sub>3</sub>): 155.5, 136.7, 128.5, 128.1, 128.0, 66.4, 49.9, 49.8, 33.4, 25.4, 24.7; HRMS (ESI, *m/z*): [M + H]<sup>+</sup> calculated for C<sub>14</sub>H<sub>20</sub>NO<sub>2</sub>: 234.1494; found: 234.1411.

**Benzyl cyclopentylcarbamate (3b):**<sup>1</sup> 67% yield; R<sub>f</sub> = 0.20 (5:95 = EtOAc/n-

Hexane); Colorless solid; mp. 51-53°C; IR (neat): 3325, 2953, 2870, 1695, 1683, 1539, 1256, 1048, 875, 825, 750, 728, 693 cm<sup>-1</sup>; <sup>1</sup>H NMR (400 MHz,

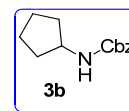

CDCl<sub>3</sub>): 7.39-7.28 (m, 5H), 5.12 (s, 2H), 4.74 (s, 1H), 4.02 (m, 1H), 1.98 (m, 2H), 1.64 (m, 4H), 1.42 (m, 2H); <sup>13</sup>C NMR (100 MHz, CDCl<sub>3</sub>): 155.9, 136.6, 128.5, 128.1, 128.0, 66.5, 52.8, 33.2, 23.5; HRMS (ESI, *m/z*): [M + H]<sup>+</sup> calculated for C<sub>13</sub>H<sub>18</sub>NO<sub>2</sub>: 220.1338; found: 220.1332.

**Benzyl cycloheptylcarbamate (3c):** 83% yield; R<sub>f</sub> = 0.27 (10:90 = EtOAc/n-

Hexane); Colorless solid; mp. 54-57°C; IR (neat): 3331, 2928, 2857, 1715,

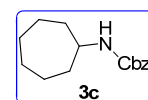

1694, 1531, 1455, 1315, 1239, 1104, 1040, 1020, 824, 776, 737, 696 cm<sup>-1</sup>; <sup>1</sup>H NMR (400 MHz, CDCl<sub>3</sub>): 7.34-7.28 (m, 5H), 5.06 (s, 2H), 4.74 (s, 1H), 3.69 (s, 1H), 1.91 (m, 2H), 1.64-

1.35 (m, 10H);  $^{13}\text{C}$  NMR (100 MHz,  $\text{CDCl}_3$ ): 155.4, 136.7, 128.5, 128.1, 128.0, 66.4, 52.1, 35.3, 28.0, 23.9 ; HRMS (ESI,  $m/z$ ):  $[\text{M} + \text{H}]^+$  calculated for  $\text{C}_{15}\text{H}_{22}\text{NO}_2$ : 248.1651; found: 248.1645.

**Benzyl cyclooctylcarbamate (3d):**<sup>2</sup> 59% yield;  $R_f = 0.3$  (10:90 = EtOAc/n-Hexane); Colorless liquid; IR (neat): 3331, 2923, 2855, 1712, 1694, 1520, 1455, 1312, 1245, 1093, 1045, 989, 776, 737, 696  $\text{cm}^{-1}$ ;  $^1\text{H}$  NMR (400 MHz,  $\text{CDCl}_3$ ): 7.35-7.29 (m, 5H), 5.06 (s, 2H), 4.69 (s, 1H), 3.73 (s, 1H), 1.82 (m, 2H), 1.72-1.22 (m, 14H);  $^{13}\text{C}$  NMR (100 MHz,  $\text{CDCl}_3$ ): 155.4, 136.7, 128.5, 128.0, 66.4, 51.1, 32.3, 27.2, 25.4, 23.5; HRMS (ESI,  $m/z$ ):  $[\text{M} + \text{H}]^+$  calculated for  $\text{C}_{16}\text{H}_{24}\text{NO}_2$ : 262.1807; found: 262.1802.

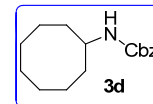

**Benzyl (1-benzoylpiperidin-4-yl)carbamate (3e):** 92% yield;  $R_f = 0.23$  (30:70 = EtOAc/n-Hexane); Colorless oil; IR (neat): 3306, 3061, 2947, 2862, 1713, 1614, 1531, 1446, 1370, 1318, 1275, 1233, 1109, 1041, 920, 848, 781, 733, 709, 629, 570  $\text{cm}^{-1}$ ;  $^1\text{H}$  NMR (400 MHz,  $\text{CDCl}_3$ ): 7.48-7.28 (m, 10 H), 5.11 (s, 2H), 4.85 (m, 1H), 4.61 (s, 1H), 3.78 (m, 2H), 3.04 (m, 2H), 2.51 (s, 1H), 1.99 (m, 2H), 1.40 (m, 2H);  $^{13}\text{C}$  NMR (100 MHz,  $\text{CDCl}_3$ ): 206.7, 170.4, 155.5, 136.3, 135.8, 129.7, 128.5, 128.2, 126.8, 66.7, 48.4, 41.0, 33.0, 32.1; HRMS (ESI,  $m/z$ ):  $[\text{M} + \text{H}]^+$  calculated for  $\text{C}_{20}\text{H}_{23}\text{N}_2\text{O}_3$ : 339.1709; found: 339.1707.

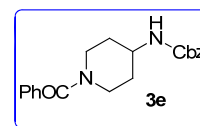

**Benzyl (tetrahydro-2H-thiopyran-4-yl)carbamate (3f):** 89% yield;  $R_f = 0.32$  (20:80 = EtOAc/n-Hexane); Colorless solid; mp. 126-131°C; IR (neat): 3314, 2942, 1682, 1542, 1310, 1266, 1229, 1141, 1066, 1029, 968, 845, 757, 694  $\text{cm}^{-1}$ ;  $^1\text{H}$  NMR (400 MHz,  $\text{CDCl}_3$ ): 7.31 (m, 5H), 5.07 (s, 2H), 4.73 (s, 1H), 3.52 (m, 1H), 2.62 (m, 4H), 2.20 (d,  $J = 12.66$  Hz, 2H), 1.53 (dd,  $J = 17.25$  Hz & 3.24 Hz, 2H) ;  $^{13}\text{C}$  NMR (100 MHz,  $\text{CDCl}_3$ ): 155.4, 136.4, 128.5, 128.1, 66.7, 49.3, 34.4, 27.7; HRMS (ESI,  $m/z$ ):  $[\text{M} + \text{H}]^+$  calculated for  $\text{C}_{13}\text{H}_{18}\text{NO}_2\text{S}$ : 252.1058; found: 252.1053

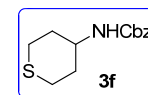

**Benzyl-adamantan-2-ylcarbamate (3g):** 91% yield;  $R_f = 0.33$  (10:90 = EtOAc/n-Hexane); Colorless solid; mp. 66°C; IR (neat): 3340, 2907, 2857, 1717, 1700, 1522, 1507, 1456, 1431, 1090, 1013, 875, 824, 676  $\text{cm}^{-1}$ ;  $^1\text{H}$  NMR (400 MHz,  $\text{CDCl}_3$ ): 7.40-7.28 (m, 5H), 5.12 (s, 3H), 3.85 (d,  $J = 6.77$  Hz, 1H), 1.96 (m, 2H), 1.82 (m, 10H), 1.63 (d,  $J = 12.63$  Hz, 2H) ;  $^{13}\text{C}$  NMR (100 MHz,  $\text{CDCl}_3$ ): 155.6,

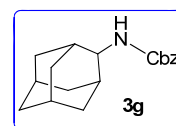

136.6, 128.5, 128.2, 128.1, 66.5, 55.0, 37.5, 37.1, 36.5, 31.7, 27.1, 27.0; HRMS (ESI,  $m/z$ ): [M + H]<sup>+</sup> calculated for C<sub>18</sub>H<sub>24</sub>NO<sub>2</sub>: 286.1807; found: 286.1807.

***tert*-Butyl 1,4-dioxaspiro[4.5]decan-8-ylcarbamate (3h):**<sup>3</sup> 72% yield; R<sub>f</sub> = 0.28 (10:90 = EtOAc/n-Hexane); Colorless solid; mp. 115-120°C; IR (neat): 3371, 2952, 2872, 1681, 1519, 1456, 1366, 1274, 1159, 1103, 929, 877, 831, 765 cm<sup>-1</sup>; <sup>1</sup>H NMR (400 MHz, CDCl<sub>3</sub>): 4.46 (s, 1H), 3.94 (s, 4H), 3.53 (s, 1H), 1.93 (m, 2H), 1.73 (m, 3H), 1.63 (dt,  $J = 12.25$  & 3.82 Hz, 2H), 1.49 (dd,  $J = 12.16$  & 3.94 Hz, 1H), 1.45 (s, 9H); <sup>13</sup>C NMR (100 MHz, CDCl<sub>3</sub>): 155.2, 107.9, 79.2, 64.3, 64.2, 48.1, 38.1, 33.8, 33.0, 30.1, 28.4, 28.2; HRMS (ESI,  $m/z$ ): [M + H]<sup>+</sup> calculated for C<sub>13</sub>H<sub>24</sub>NO<sub>4</sub>: 258.1705; found: 258.1706.

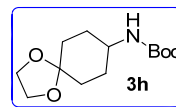

**Benzyl sec-butylcarbamate (3i):**<sup>4</sup> 81% yield; R<sub>f</sub> = 0.29 (10:90 = EtOAc/n-Hexane); Colorless solid; mp. 47°C; IR (neat): 3327, 2968, 1717, 1699, 1521, 1456, 1240, 1099, 1026, 737, 697 cm<sup>-1</sup>; <sup>1</sup>H NMR (400 MHz, CDCl<sub>3</sub>): 7.38-7.28 (m, 5H), 5.11 (s, 2H), 4.63 (s, 1H), 3.68 (m, 1H), 4.18 (m, 2H), 1.15 (d,  $J = 6.60$  Hz, 3H), 0.93 (t,  $J = 7.42$  Hz, 3H); <sup>13</sup>C NMR (100 MHz, CDCl<sub>3</sub>): 155.8, 136.7, 128.5, 128.0, 66.4, 48.5, 29.8, 20.6, 10.2; HRMS (ESI,  $m/z$ ): [M + H]<sup>+</sup> calculated for C<sub>12</sub>H<sub>18</sub>NO<sub>2</sub>: 208.1338; found: 208.1359.

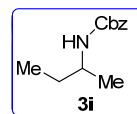

**Benzyl (3-methylbutan-2-yl)carbamate (3j):**<sup>5</sup> 95% yield; R<sub>f</sub> = 0.31 (10:90 = EtOAc/n-Hexane); Colorless oil; IR (neat): 3331, 3034, 2962, 2875, 1713, 1537, 1454, 1374, 1343, 1241, 101, 1028, 932, 775, 737, 697 cm<sup>-1</sup>; <sup>1</sup>H NMR (400 MHz, CDCl<sub>3</sub>): 7.38-7.31 (m, 5H), 5.11 (s, 2H), 4.70 (s, 1H), 3.63 (m, 1H), 1.72 (m, 1H), 1.11 (d,  $J = 6.74$  Hz, 3H), 0.92 (d,  $J = 6.74$  Hz, 6H); <sup>13</sup>C NMR (100 MHz, CDCl<sub>3</sub>): 155.9, 136.7, 128.5, 128.1, 128.0, 66.5, 51.9, 33.1, 28.3, 18.3, 17.7; HRMS (ESI,  $m/z$ ): [M + H]<sup>+</sup> calculated for C<sub>13</sub>H<sub>20</sub>NO<sub>2</sub>: 222.1494; found: 222.1492.

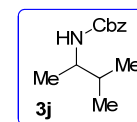

**Benzyl (4-phenylbutan-2-yl)carbamate (3k):** 66% yield; R<sub>f</sub> = 0.37 (10:90 = EtOAc/n-Hexane); Off white solid; mp. 48°C; IR (neat): 3326, 3029, 2930, 1717, 1521, 1455, 1338, 1245, 1053, 1024, 748, 698 cm<sup>-1</sup>; <sup>1</sup>H NMR (400 MHz, CDCl<sub>3</sub>): 7.40-7.19 (m, 10H), 5.31 (s, 2H), 4.63 (m, 1H), 3.83 (m, 1H), 2.29 (dt,  $J = 8.15$  Hz & 2.79 Hz, 2H), 1.78 (m, 2H), 1.22 (d,  $J = 6.54$  Hz, 3H); <sup>13</sup>C NMR (100 MHz, CDCl<sub>3</sub>):

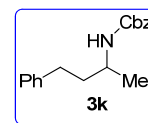

155.7, 141.7, 136.6, 128.5, 128.4, 128.3, 128.1, 125.9, 66.5, 47.0, 38.9, 32.4, 21.3; HRMS (ESI,  $m/z$ ):  $[M + H]^+$  calculated for  $C_{18}H_{22}NO_2$ : 284.1651; found: 284.1645.

**Benzyl pentan-3-ylcarbamate (3l):**<sup>6</sup> 91% yield;  $R_f = 0.33$  (10:90 = EtOAc/n-

Hexane); Colorless oil; IR (neat): 3314, 3035, 2960, 2875, 1693, 1537, 1454, 1298, 1249, 1159, 1101, 1044, 967, 777, 727, 694, 575  $cm^{-1}$ ;  $^1H$  NMR (400

MHz,  $CDCl_3$ ): 7.38-7.31 (m, 5H), 5.12 (s, 2H), 4.57 (s, 1H), 3.52 (s, 1H), 1.45 (m, 2H), 1.36 (m, 3H), 0.93 (t,  $J = 7.39$  Hz, 6H);  $^{13}C$  NMR (100 MHz,  $CDCl_3$ ): 156.3, 136.7, 128.5, 128.0, 66.4, 54.0, 27.6, 10.1; HRMS (ESI,  $m/z$ ):  $[M + H]^+$  calculated for  $C_{13}H_{20}NO_2$ : 222.1494; found: 222.1486.

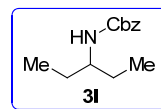

**Benzyl undecan-6-ylcarbamate (3m):** 60% yield;  $R_f = 0.25$  (03:97 =

EtOAc/n-Hexane); Colorless solid; mp. 66°C; IR (neat): 3321, 2934, 2857, 1697, 1688, 1540, 1458, 1276, 1252, 1112, 1040, 825, 726, 684  $cm^{-1}$ ;  $^1H$

NMR (400 MHz,  $CDCl_3$ ): 7.38-7.33 (m, 5H), 5.12 (s, 2H), 4.50 (d,  $J = 8.77$  Hz, 1H), 3.63 (m, 1H), 1.49 (m, 2H), 1.32 (m, 15H), 0.90 (m, 6H);  $^{13}C$  NMR (100 MHz,  $CDCl_3$ ): 156.1, 136.8, 128.5, 128.0, 66.4, 51.3, 37.4, 35.4, 31.9, 31.7, 25.3, 22.5, 14.0; HRMS (ESI,  $m/z$ ):  $[M + H]^+$  calculated for  $C_{19}H_{32}NO_2$ : 306.2433; found: 306.2435.

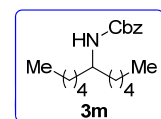

**Ethyl cyclohexylcarbamate (3n):**<sup>7</sup> 91% yield;  $R_f = 0.22$  (10:90 = EtOAc/n-

Hexane); Colorless solid; mp. 52-55°C; IR (neat): 3323, 2974, 2932, 2856, 1685, 1540, 1447, 1371, 1314, 1280, 1251, 1235, 1146, 1056, 968, 892, 779,

667,  $cm^{-1}$ ;  $^1H$  NMR (400 MHz,  $CDCl_3$ ): 4.59 (s, 1H), 4.09 (d,  $J = 6.91$  Hz, 2H), 3.47 (s, 1H), 1.91 (m, 2H), 1.70 (m, 2H), 1.59 (m, 1H), 1.34 (m, 2H), 1.23 (t,  $J = 7.10$  Hz, 3H), 1.13 (m, 3H);  $^{13}C$  NMR (100 MHz,  $CDCl_3$ ): 155.8, 60.4, 49.6, 33.4, 25.4, 24.7, 14.6; HRMS (ESI,  $m/z$ ):  $[M + H]^+$  calculated for  $C_9H_{18}NO_2$ : 172.1338; found: 172.1388.

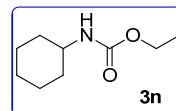

**tert-butyl cyclohexylcarbamate (3o):** 61% yield;  $R_f = 0.29$  (05:95 = EtOAc/n-

Hexane); Colorless solid; mp. 72-74°C; IR (neat): 3364, 2933, 2853, 1681, 1523, 1447, 1365, 1315, 1279, 1251, 1232, 1167, 1048, 902, 763  $cm^{-1}$ ;  $^1H$  NMR

(400 MHz,  $CDCl_3$ ): 4.44 (s, 1H), 3.43 (s, 1H), 1.93 (m, 2H), 1.70 (m, 2H), 1.60 (m, 1H), 1.45 (s, 9H), 1.34 (m, 2H), 1.13 (m, 3H);  $^{13}C$  NMR (100 MHz,  $CDCl_3$ ): 155.2, 78.9, 49.3, 33.5, 28.4, 25.5, 24.8; HRMS (ESI,  $m/z$ ):  $[M + Na]^+$  calculated for  $C_{11}H_{21}NaNO_2$ : 222.1470; found: 222.1478.

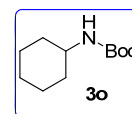

**(9H-Fluoren-9-yl)methyl cyclohexylcarbamate (3p):** 84% yield;  $R_f = 0.29$

(10:90 = EtOAc/n-Hexane); Colorless solid; mp. 161-163°C; IR (neat): 3324,

2933, 2852, 1683, 1534, 1445, 1311, 1276, 1140, 1041, 757, 734  $\text{cm}^{-1}$ ;  $^1\text{H}$

NMR (400 MHz,  $\text{CDCl}_3$ ): 7.79 (d,  $J = 7.52$  Hz, 2H), 7.62 (d,  $J = 7.52$  Hz, 2H), 7.43 (t,  $J =$

7.44 Hz, 2H), 7.34 (td,  $J = 7.49$  Hz, 0.92 Hz, 2H), 4.67 (s, 1H), 4.32 (d,  $J = 6.58$  Hz, 2H),

4.25 (t,  $J = 6.63$  Hz, 1H), 3.52 (s, 1H), 1.97 (m, 2H), 1.74 (m, 2H), 1.63 (m, 1H), 1.38 (m,

2H), 1.16 (m, 3H);  $^{13}\text{C}$  NMR (100 MHz,  $\text{CDCl}_3$ ): 155.6, 144.0, 141.3, 127.6, 127.0, 125.0,

119.9, 66.3, 49.9, 47.3, 33.4, 25.5, 24.8; HRMS (ESI,  $m/z$ ):  $[\text{M} + \text{H}]^+$  calculated for

$\text{C}_{21}\text{H}_{24}\text{NO}_2$ : 322.1807; found: 322.1814.

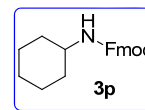

**N-Cyclohexylbenzenesulfonamide (3q):** 55% yield;  $R_f = 0.19$  (10:90 =

EtOAc/n-Hexane); Colorless oil; IR (neat): 3281, 2934, 2856, 1484, 1448,

1324, 1160, 1094, 993, 914, 884, 840, 756, 720, 690, 593, 561  $\text{cm}^{-1}$ ;  $^1\text{H}$  NMR

(400 MHz,  $\text{CDCl}_3$ ): 7.90 (m, 2H), 7.55 (m, 3H), 4.59 (d,  $J = 7.30$  Hz, 1H), 3.17 (m, 1H), 1.77

(m, 2H), 1.64 (m, 3H), 1.53 (m, 1H), 1.20 (m, 5H);  $^{13}\text{C}$  NMR (100 MHz,  $\text{CDCl}_3$ ): 141.4,

132.4, 129.0, 126.8, 52.6, 33.9, 25.1, 24.6; HRMS (ESI,  $m/z$ ):  $[\text{M} + \text{H}]^+$  calculated for

$\text{C}_{12}\text{H}_{18}\text{NO}_2\text{S}$ : 240.1058; found: 240.1091.

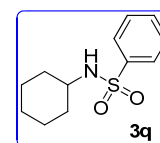

**N-Cyclohexyl-4-methylbenzenesulfonamide (3r):**<sup>8</sup> 86% yield;  $R_f = 0.21$

(10:90 = EtOAc/n-Hexane); Colorless solid; mp. 81-83°C; IR (neat): 3278,

2933, 2856, 1599, 1451, 1324, 1160, 1094, 994, 914, 883, 815, 666, 572  $\text{cm}^{-1}$ ;

$^1\text{H}$  NMR (400 MHz,  $\text{CDCl}_3$ ): 7.79(d,  $J = 8.24$  Hz, 2H), 7.31 (d,  $J = 8.09$ ), 4.77 (d,  $J = 6.38$

Hz, 1H), 3.12 (m, 1H), 2.44 (s, 3H), 1.75 (m, 2H), 1.63 (m, 2H), 1.51(m, 1H), 1.18 (m, 5H);

$^{13}\text{C}$  NMR (100 MHz,  $\text{CDCl}_3$ ): 143.0, 138.5, 129.6, 126.9, 52.5, 33.8, 25.1, 24.6, 21.5; HRMS

(ESI,  $m/z$ ):  $[\text{M} + \text{Na}]^+$  calculated for  $\text{C}_{13}\text{H}_{19}\text{NaNO}_2\text{S}$ : 276.1034; found: 276.1068.

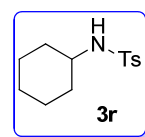

**N-Cyclohexyl-4-nitrobenzenesulfonamide (3s):** 42% yield;  $R_f = 0.32$

(20:80 = EtOAc/n-Hexane); Colorless solid; mp. 129-131°C; IR (neat):

3287, 2933, 2856, 1530, 1451, 1350, 1164, 1093, 854, 736, 685, 615, 560,

466  $\text{cm}^{-1}$ ;  $^1\text{H}$  NMR (400 MHz,  $\text{CDCl}_3$ ): 8.39 (d,  $J = 8.17$  Hz, 2H), 8.09 (s,  $J$

= 8.17 Hz, 2H), 4.55 (m, 1H), 3.26 (m, 1H), 1.80 (m, 1H), 1.68 (m, 1H), 1.59 (m, 3H, having

residual water peak), 1.22 (m, 5H);  $^{13}\text{C}$  NMR (100 MHz,  $\text{CDCl}_3$ ): 149.9, 147.5, 128.1, 124.3,

53.1, 34.0, 29.7, 24.9, 24.6; HRMS (ESI,  $m/z$ ):  $[\text{M} + \text{Na}]^+$  calculated for  $\text{C}_{12}\text{H}_{16}\text{NaN}_2\text{O}_4\text{S}$ :

307.0728; found: 307.0724.

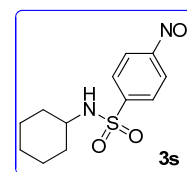

**N-Cyclohexylmethanesulfonamide (3t):** 66% yield;  $R_f = 0.22$  (20:80 =

EtOAc/n-Hexane); Colorless solid; mp. 100-104°C; IR (neat): 3254, 2934, 2854, 1452, 1423, 1307, 1155, 1080, 999, 884, 738, 525  $\text{cm}^{-1}$ ;  $^1\text{H}$  NMR (400

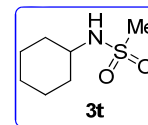

MHz,  $\text{CDCl}_3$ ): 4.37 (d,  $J = 6.38$  Hz, 1H), 3.31 (m, 1H), 2.99 (s, 3H), 2.01 (m, 2H), 1.75 (m, 2H), 1.63 (m, 1H), 1.29 (m, 5H);  $^{13}\text{C}$  NMR (100 MHz,  $\text{CDCl}_3$ ): 52.8, 42.1, 44.4, 25.1, 24.7; HRMS (ESI,  $m/z$ ):  $[\text{M} + \text{Na}]^+$  calculated for  $\text{C}_7\text{H}_{15}\text{NaNO}_2\text{S}$ : 200.0721; found: 200.0767.

**N-Cyclohexylbenzamide (3u):** 85% yield;  $R_f = 0.25$  (10:90 = EtOAc/n-

Hexane); Colorless solid; mp. 149-151°C; IR (neat): 3314, 2929, 2852, 1627, 1535, 1330, 1256, 1149, 1081, 849, 692  $\text{cm}^{-1}$ ;  $^1\text{H}$  NMR (400 MHz,

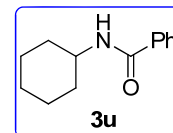

$\text{CDCl}_3$ ): 7.76 (d,  $J = 7.22$  Hz, 2H), 7.44 (tt,  $J = 7.35$  Hz & 2.14 Hz, 1H), 7.36 (t,  $J = 7.68$  Hz, 2H), 6.43 (d,  $J = 6.80$  Hz, 1H), 3.94 (m, 1H), 1.98 (m, 2H), 1.72 (m, 2H), 1.62 (m, 1H), 1.27 (m, 5H);  $^{13}\text{C}$  NMR (100 MHz,  $\text{CDCl}_3$ ): 166.7, 135.0, 131.1, 128.3, 126.9, 48.7, 33.1, 25.5, 24.9; HRMS (ESI,  $m/z$ ):  $[\text{M} + \text{H}]^+$  calculated for  $\text{C}_{13}\text{H}_{17}\text{NO}$ : 204.1388; found: 204.1401.

**N-Cyclohexylacetamide (3v):** 63% yield;  $R_f = 0.28$  (50:50 = EtOAc/n-

Hexane); Colorless solid; mp. 107-109°C; IR (neat): 3299, 2932, 2852, 1640, 1557, 1445, 1374, 1314, 1155, 1117, 981, 893, 737, 607, 550  $\text{cm}^{-1}$ ;  $^1\text{H}$

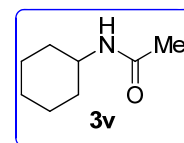

NMR (400 MHz,  $\text{CDCl}_3$ ): 5.45 (s, 1H), 3.76 (m, 1H), 1.96 (s, 3H), 1.92 (m, 2H), 1.71 (m, 2H), 1.62 (m, 1H), 1.37 (m, 2H), 1.14 (m, 3H);  $^{13}\text{C}$  NMR (100 MHz,  $\text{CDCl}_3$ ): 169.1, 48.2, 33.2, 25.5, 24.8, 23.5; HRMS (ESI,  $m/z$ ):  $[\text{M} + \text{H}]^+$  calculated for  $\text{C}_8\text{H}_{15}\text{NO}$ : 142.1232; found: 142.1237.

**3-Cyclohexyloxazolidin-2-one (3w):**<sup>9</sup> 65% yield;  $R_f = 0.27$  (30:70 =

EtOAc/n-Hexane); Colorless oil; IR (neat): 3494, 2932, 2856, 1713, 1484, 1422, 1422, 1252, 1148, 1062, 999, 973, 893, 823, 763, 699  $\text{cm}^{-1}$ ;  $^1\text{H}$  NMR

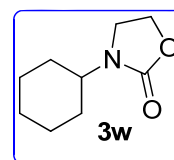

(400 MHz,  $\text{CDCl}_3$ ): 4.27 (t,  $J = 8.07$  Hz, 2H), 3.62 (m, 1H), 3.49 (t,  $J = 8.03$  Hz, 2H), 1.77 (m, 4H), 1.63 (m, 1H), 1.33 (m, 4H), 1.07 (m, 1H);  $^{13}\text{C}$  NMR (100 MHz,  $\text{CDCl}_3$ ): 157.8, 62.0, 52.4, 40.5, 30.2, 25.3, 25.2; HRMS (ESI,  $m/z$ ):  $[\text{M} + \text{H}]^+$  calculated for  $\text{C}_9\text{H}_{16}\text{NO}_2$ : 170.1181; found: 170.1199.



**4-Methyl-N-(2-methylcyclohexyl)benzenesulfonamide (6a):** 50% yield; *dr* =

19:81;  $R_f$  = 0.21 (10:90 = EtOAc/n-Hexane); Colorless solid; mp. 95°-97°C; IR (neat): 3290, 22, 2858, 1599, 1453, 1326, 1162, 1093, 1022, 1007, 918, 882, 814, 666, 574, 550  $\text{cm}^{-1}$ ;  $^1\text{H}$  NMR (400 MHz,  $\text{CDCl}_3$ ): 7.79 (d,  $J$  = 8.44 Hz, 2H), 7.30 (d,  $J$  = 7.99 Hz, 2H), 4.76 (m, 1H), 3.34 (m, 1H), 2.44 (s, 3H), 1.68 (m, 2H), 1.53 (m, 2H), 1.40 (m, 3H), 1.20 (m, 2H), 0.77 (d,  $J$  = 7.00 Hz, 3H);  $^{13}\text{C}$  NMR (100 MHz,  $\text{CDCl}_3$ ): 143.0, 138.3, 129.5, 127.0, 59.1, 54.4, 38.4, 34.3, 2.8, 25.4, 25.3, 23.4, 21.5, 19.0, 16.3; HRMS (ESI,  $m/z$ ):  $[\text{M} + \text{H}]^+$  calculated for  $\text{C}_{14}\text{H}_{22}\text{NO}_2\text{S}$ : 268.1371; found: 268.1418.

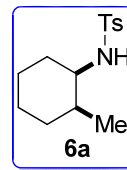

**(9H-fluoren-9-yl)methyl (2-methylcyclohexyl)carbamate (6b)** 88% yield; *dr*

= 17:83;  $R_f$  = 0.25 (10:90 = EtOAc/n-Hexane); Colorless solid; mp. 156-159°C; IR (neat): 3339, 2929, 2856, 1697, 1531, 1449, 1327, 1237, 1107, 1078, 991, 758, 739  $\text{cm}^{-1}$ ;  $^1\text{H}$  NMR (400 MHz,  $\text{CDCl}_3$ ): 7.80 (d,  $J$  = 7.57 Hz, 2H), 7.63 (d,  $J$  = 7.45 Hz, 2H), 7.43 (t,  $J$  = 7.37 Hz, 2H), 7.35 (td,  $J$  = 7.49 Hz, 0.98 Hz, 2H), 4.83 (d,  $J$  = 8.36 Hz, 1H), 4.44 (m, 2H), 4.27 (t,  $J$  = 6.81 Hz, 1H), 3.83 (m, 1H), 1.17 (m, 1H), 1.76-1.16 (m, 9H), 0.91 (d,  $J$  = 7.02 Hz, 3H);  $^{13}\text{C}$  NMR (100 MHz,  $\text{CDCl}_3$ ): 156.0, 144.0, 141.3, 127.6, 127.0, 125.0, 119.9, 66.3, 51.3, 47.4, 33.7, 30.0, 22.0, 16.4; HRMS (ESI,  $m/z$ ):  $[\text{M} + \text{H}]^+$  calculated for  $\text{C}_{22}\text{H}_{26}\text{NO}_2$ : 336.1964; found: 336.1958.

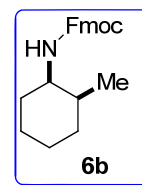

**tert-Butyl (2-methylcyclohexyl)carbamate (6c):**<sup>10</sup> 54% yield; *dr* = 9:91;  $R_f$

= 0.31 (05:95 = EtOAc/n-Hexane); Colorless oil; IR (neat): 3344, 2930, 2857, 1698, 1503, 1455, 1390, 1365, 1245, 1174, 1101, 1068, 1052, 967  $\text{cm}^{-1}$ ;  $^1\text{H}$  NMR (400 MHz,  $\text{CDCl}_3$ ): 4.59 (m, 1H), 3.74 (m, 1H), 1.85 (m, 1H), 1.68 (m, 3H), 1.52 (m, 2H), 1.46 (s, 9H), 1.32 (m, 2H), 1.20 (m, 2H), 0.87 (d,  $J$  = 6.95 Hz, 3H);  $^{13}\text{C}$  NMR (100 MHz,  $\text{CDCl}_3$ ): 155.6, 78.8, 50.6, 38.9, 33.8, 28.4, 25.5, 22.2, 16.2; HRMS (ESI,  $m/z$ ):  $[\text{M} - \text{H}]^+$  calculated for  $\text{C}_{12}\text{H}_{22}\text{NO}_2$ : 212.1651; found: 212.1677.

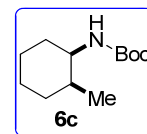

**tert-Butyl (2-allylcyclohexyl)carbamate (6d):** 75% yield; *dr* = 19:81;  $R_f$  =

0.31 (10:90 = EtOAc/n-Hexane); Colorless oil; IR (neat): 3347, 2977, 2930, 2857, 1697, 1505, 1454, 1391, 1365, 1247, 1172, 1062, 971, 910, 873, 780  $\text{cm}^{-1}$ ;  $^1\text{H}$  NMR (400 MHz,  $\text{CDCl}_3$ ): 5.76 (m, 1H), 4.98 (m, 2H), 4.61 (m, 1H), 3.81 (m, 1H), 2.07 (m, 1H), 1.88 (m, 2H), 1.69 (m, 1H), 1.51 (m, 2H), 1.43 (s, 9H), 1.35 (m, 1H), 1.25 (m, 2H), 1.11 (m, 2H);  $^{13}\text{C}$  NMR (100 MHz,  $\text{CDCl}_3$ ): 155.4, 137.1, 115.8, 78.9,

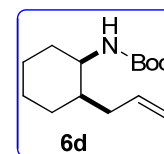

;53.5, 49.2, 43.4, 37.2, 34.3, 30.9, 30.7, 29.7, 28.4, 27.3, 25.5, 25.4, 24.3, 21.6; HRMS (ESI,  $m/z$ ):  $[M + H]^+$  calculated for  $C_{14}H_{26}NO_2$ : 240.1964; found: 240.1945.

**N-(2-Allylcyclohexyl)-4-methylbenzenesulfonamide (6e):**<sup>11</sup> 74% yield;  $dr =$

3:97;  $R_f = 0.3$  (15:85 = EtOAc/n-Hexane); White solid; mp. 145°-148°C; IR (neat): 3288, 2930, 2858, 1452, 1425, 1327, 1161, 1093, 1001, 910, 813, 671  $cm^{-1}$ ;  $^1H$  NMR (400 MHz,  $CDCl_3$ ): 7.78 (d,  $J = 8.22$  Hz, 2H), 7.31 (d,  $J = 8.03$

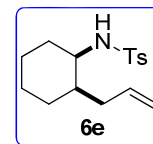

Hz, 2H), 5.62 (m, 1H), 4.95 (m, 2H), 4.63 (d,  $J = 8.52$  Hz, 1H), 3.48 (m, 1H), 2.44 (s, 3H), 2.00 (m, 1H), 1.89 (m, 1H), 1.54 (m, 3H), 1.42-1.04 (m, 6H);  $^{13}C$  NMR (100 MHz,  $CDCl_3$ ): 143.1, 136.6, 129.6, 127.0, 116.0, 53.2, 40.1, 35.6, 30.5, 26.9, 23.8, 21.5, 21.2; HRMS (ESI,  $m/z$ ):  $[M + H]^+$  calculated for  $C_{16}H_{24}NO_2S$ : 294.1528; found: 294.1541

**Benzyl (2-allylcyclohexyl)carbamate (6f):** 91% yield;  $dr = >1:99$ ;  $R_f = 0.31$

(5:95 = EtOAc/n-Hexane); Colorless oil; IR (neat): 3342, 2930, 2856, 1713, 1695, 1519, 1455, 1335, 1237, 1105, 1064, 978, 911, 737, 697  $cm^{-1}$ ;  $^1H$  NMR (400 MHz,  $CDCl_3$ ): 7.40-7.26 (m, 5H), 5.79 (m, 1H), 5.12 (s, 2H), 5.01 (d,  $J =$

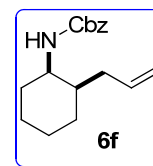

14.08 Hz, 2H), 4.89 (d,  $J = 7.73$  Hz, 1H), 3.95 (m, 1H), 2.10 (m, 1H), 1.93 (m, 1H), 1.77 (m, 1H), 1.67 (m, 2H), 1.52 (m, 3H), 1.34 (m, 2H), 1.12 (m, 1H);  $^{13}C$  NMR (100 MHz,  $CDCl_3$ ): 155.8, 136.9, 136.6, 128.5, 128.1, 116.0, 66.6, 49.9, 39.6, 36.2, 30.7, 27.2, 24.3, 21.5; HRMS (ESI,  $m/z$ ):  $[M + H]^+$  calculated for  $C_{17}H_{24}NO_2$ : 274.1807; found: 274.1818.

**4-Methyl-N-(2-(3-methylbut-2-en-1-yl)cyclohexyl)benzenesulfonamide (6g):**

68% yield;  $dr = >1:99$ ;  $R_f = 0.22$  (10:90 = EtOAc/n-Hexane); Colorless solid, mp. 117°-123°C; IR (neat): 3291, 2928, 2856, 1599, 1451, 1328, 1158, 1093, 1021, 1001, 918, 814, 707, 670, 551  $cm^{-1}$ ;  $^1H$  NMR

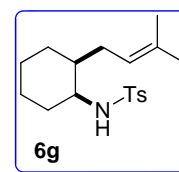

(400 MHz,  $CDCl_3$ ): 7.76 (d,  $J = 8.25$  Hz, 2H), 7.26 (d,  $J = 8.03$  Hz, 2H), 4.82 (m, 2H), 3.41 (m, 1H), 2.39 (s, 3H), 1.77 (m, 2H), 1.60 (s, 3H), 1.54 (m, 2H), 1.48 (s, 3H), 1.37 (m, 4H), 1.26 (m, 1H), 1.11 (m, 2H);  $^{13}C$  NMR (100 MHz,  $CDCl_3$ ): 143.0, 138.3, 129.5, 127.0, 122.3, 53.4, 40.8, 30.8, 27.1, 25.7, 21.5, 21.2, 17.7; HRMS (ESI,  $m/z$ ):  $[M + H]^+$  calculated for  $C_{18}H_{28}NO_2S$ : 322.1841; found: 322.1837.

**(E)-Benzyl (2-cinnamylcyclohexyl)carbamate (6h):** 75% yield;  $dr =$  12:88;  $R_f = 0.21$  (5:95 = EtOAc/n-Hexane); Colorless solid; mp. 81-85°C;

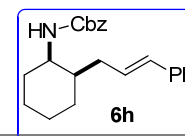

IR (neat): 3432, 3346, 2930, 1704, 1505, 1455, 1335, 1232, 1094, 1059, 969, 743, 695  $\text{cm}^{-1}$ ;  
 $^1\text{H}$  NMR (400 MHz,  $\text{CDCl}_3$ ): 7.33 (m, 9H), 7.21 (m, 1H), 6.40 (q,  $J = 16.03$  Hz, 1H), 6.24 (m, 1H), 5.13 (s, 2H), 4.93 (d,  $J = 8.58$  Hz, 1H), 3.98 (m, 1H), 2.26 (m, 1H), 2.08 (m, 1H), 1.78 (m, 2H), 1.58 (m, 4H), 1.32 (m, 2H), 1.17 (m, 1H);  $^{13}\text{C}$  NMR (100 MHz,  $\text{CDCl}_3$ ): 155.8, 137.7, 137.6, 136.6, 128.5, 128.4, 128.2, 128.1, 126.9, 126.0, 125.9, 69.1, 66.6, 50.0, 41.8, 40.2, 33.1, 30.7, 25.1, 21.5, 20.4; HRMS (ESI,  $m/z$ ):  $[\text{M} + \text{H}]^+$  calculated for  $\text{C}_{23}\text{H}_{28}\text{NO}_2$ : 350.2120; found: 350.2143.

**Synthesis of (1-(1-Tosyloctahydro-1H-indol-2-yl)butan-2-one (8):**<sup>12</sup> To an oven dried round bottom flask, N-(2-allylcyclohexyl)-4-methylbenzenesulfonamide **6e** (0.5 mmol, 1 equiv), ethyl vinyl ketone (1.25 mmol, 2.5 equiv) were taken. After adding dry DCM (3 ml) to the flask, the solution was degassed for 0.5h with nitrogen gas. Next, 5 mol % of Grubbs-II catalyst was added into the reaction flask and continued to stirred for 18h at 40°C. The reaction mixture was passed through a plug of silica, concentrated, and the mixture was purified by column chromatography.

95% yield;  $R_f = 0.25$  (30:70 = EtOAc/n-Hexane); colorless oil; IR (neat): 2933, 2859, 1713, 1599, 1455, 1415, 1337, 1158, 1094, 1009, 890, 816, 709, 665, 591  $\text{cm}^{-1}$ ;  $^1\text{H}$  NMR (400 MHz,  $\text{CDCl}_3$ ): 8.15-8.03 (2H), 7.55-7.15 (10H), 6.70-6.55 (3H), 6.41 (dd,  $J = 6, 16$  Hz, 1H), 5.23 (d,  $J = 6$  Hz, 1H), 4.93 (b s, 1H);  $^{13}\text{C}$  NMR (100 MHz,  $\text{CDCl}_3$ ): 152.1, 140.3, 138.5, 136.0, 132.3, 129.2, 128.7, 128.6, 128.2, 128.1, 127.1, 126.6, 126.2, 112.1, 60.0; HRMS (ESI,  $m/z$ ):  $[\text{M} + \text{H}]^+$  calculated for  $\text{C}_{19}\text{H}_{28}\text{NO}_3\text{S}$ : 350.1790; found: 350.1790.

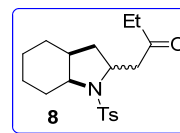

**Synthesis of Benzyl 2-(hydroxymethyl)octahydro-1H-indole-1-carboxylate (10):** mCPBA (0.6 mmol, 1.2 equiv) was added to a cooled solution (ice bath) of Benzyl (2-allylcyclohexyl)-carbamate **6f** (0.5 mmol, 1 equiv) dissolved in 3 mL of  $\text{CH}_2\text{Cl}_2$ . After 10 minutes, the ice bath was removed and continued to stir at room temperature for additional 3h. The reaction mixture was diluted by adding 30 ml  $\text{CH}_2\text{Cl}_2$  and then washed twice with 1N NaOH. The organic layer was evaporated after drying over anhydrous sodium sulfate. After dissolving the residue in *tert*-butanol (3 ml),  $^t\text{BuOK}$  (0.6 mmol) was added followed by stirring for 12h at room temperature. The excess  $^t\text{BuOK}$  was quenched (at 0°C) with 1N HCl and extract twice with 20 ml EtOAc. The organic layer was dried, concentrated and finally purified by column chromatography on silica-gel.

89% yield;  $R_f = 0.26$  (20:80 = EtOAc/n-Hexane); colorless oil; IR (neat): 3430, 2931, 2861, 1682, 1416, 1337, 1298, 1122, 1094, 1046, 773, 698  $\text{cm}^{-1}$ ;  $^1\text{H}$  NMR (400 MHz,  $\text{CDCl}_3$ ): 8.15-8.03 (2H), 7.55-7.15 (10H), 6.70-6.55 (3H), 6.41 (dd,  $J = 6, 16$  Hz, 1H), 5.23 (d,  $J = 6$  Hz, 1H), 4.93 (b s, 1H);  $^{13}\text{C}$  NMR (100 MHz,  $\text{CDCl}_3$ ): 152.1, 140.3, 138.5, 136.0, 132.3, 129.2, 128.7, 128.6, 128.2, 128.1, 127.1, 126.6, 126.2, 112.1, 60.0; HRMS (ESI,  $m/z$ ):  $[\text{M} + \text{H}]^+$  calculated for  $\text{C}_{17}\text{H}_{24}\text{NO}_3$ : 290.1756; found: 290.1751.

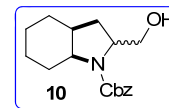

## References:

- 1) J. Matsuo, Y. Tanaki, A. Kido and H. Ishibashi, *Chem. Commun.*, 2006, 2896.
- 2) R. N. Salvatore; S. Shin; A. S. Nagle; K.W. Jung, *J. Org. Chem.*, 2001, **66**, 1035.
- 3) B. T. Gregg, K. C. Golden, J. F. Quinn, *Tetrahedron*, 2008, **64**, 3287.
- 4) W. McGhee, D. Riley, K. Christ, Y. Pan, B. Parnas, *J. Org. Chem.*, 1995, **60**, 2820.
- 5) L. K. Thalen, D. Zhao, J. B. Sortais, J. Paetzold, C. Hoben, J. Backvall, *Chem. Eur. J.*, 2009, **15**, 3403.
- 6) J. Matsuo, Y. Tanaki, A. Kido, H. Ishibashi, *Chem. Commun.*, 2006, 2896.
- 7) M. Feroci, M. Orsini, L. Rossi, G. Sotgiu, A. Inesi, *J. Org. Chem.*, 2007, **72**, 200.
- 8) S. Kundu, E. Miceli, E. Farquhar, F. F. Pfaff, U. Kuhlmann, P. Hildebrandt, B. Braun, C. Greco, K. Ray, *J. Am. Chem. Soc.*, 2012, **134**, 14710
- 9) J. W. Lown and S. M. S. Chauhan, *J. Med. Chem.* 1981, **24**, 270.
- 10) K. Fuchs, C. Dorner-Ciossek, S. Handschuh; N. Heine, S. Hoerer, K. Klinder, PCT Int. Appl. 2009, WO 2009092566 A1 20090730.
- 11) K. Moriyama, Y. Izumisawa, H. Togo, *J. Org. Chem.*, 2011, **76**, 7249.
- 12) D. C. Behenna and B. M. Stoltz, *J. Am. Chem. Soc.* 2004, **126**, 15044.
